# Supplementary material
Source: ML conference proceedings conference paper supplement (https://openreview.net/forum?id=D8-iwC9UN3)
Supplement: supplementary_material [file attachment]

## 484 Checklist

- 485 1. For all authors...
- 486 (a) Do the main claims made in the abstract and introduction accurately reflect the paper's  
487 contributions and scope? [Yes] Our paper builds on the premise that reinstantiating  
488 the implicit function theorem for every optimization problem a user may encounter  
489 is cumbersome. We make the case that a modular approach is needed to bypass that  
490 issue. This approach raises several challenges, notably in the way these implicit solvers  
491 can be automatically instantiated, consistently, across the large corpus of optimization  
492 approaches favored by users.
- 493 (b) Did you describe the limitations of your work? [Yes] , We discuss several limitations  
494 in our work. For instance, implicit differentiation requires  $\hat{x}$  to be sufficiently close to  
495  $x^*$  to be meaningful. This is the main topic of §2.3
- 496 (c) Did you discuss any potential negative societal impacts of your work? [N/A] As a  
497 purely methodological paper, we do not foresee negative societal impacts of our work.
- 498 (d) Have you read the ethics review guidelines and ensured that your paper conforms to  
499 them? [Yes] We confirm our paper conforms to those guidelines.
- 500 2. If you are including theoretical results...
- 501 (a) Did you state the full set of assumptions of all theoretical results? [Yes] , The paper  
502 contains one theoretical section, §2.3.
- 503 (b) Did you include complete proofs of all theoretical results? [Yes] , All proofs are  
504 included in the Appendix D
- 505 3. If you ran experiments...
- 506 (a) Did you include the code, data, and instructions needed to reproduce the main exper-  
507 imental results (either in the supplemental material or as a URL)? [No] At the time  
508 of submission, we are in the course of an approval process for open-source release  
509 required by our organization. We believe that the library itself comprises a contribution,  
510 and will have it available in open source by the time of this paper's publication (at the  
511 latest).
- 512 (b) Did you specify all the training details (e.g., data splits, hyperparameters, how they  
513 were chosen)? [Yes] , Experiments were mostly run with minimal parameter tuning to  
514 reflect the simplicity of the approach we advocate. This is reflected in §3 and Appendix  
515 E
- 516 (c) Did you report error bars (e.g., with respect to the random seed after running ex-  
517 periments multiple times)? [Yes] , see Figure 2 and std for the dictionary learning  
518 task.
- 519 (d) Did you include the total amount of compute and the type of resources used (e.g., type  
520 of GPUs, internal cluster, or cloud provider)? [Yes] , see Appendix E
- 521 4. If you are using existing assets (e.g., code, data, models) or curating/releasing new assets...
- 522 (a) If your work uses existing assets, did you cite the creators? [Yes] , see §3 and Appendix  
523 E
- 524 (b) Did you mention the license of the assets? [Yes] , see Appendix E
- 525 (c) Did you include any new assets either in the supplemental material or as a URL? [N/A]
- 526
- 527 (d) Did you discuss whether and how consent was obtained from people whose data you're  
528 using/curating? [N/A]
- 529 (e) Did you discuss whether the data you are using/curating contains personally identifiable  
530 information or offensive content? [N/A]
- 531 5. If you used crowdsourcing or conducted research with human subjects...
- 532 (a) Did you include the full text of instructions given to participants and screenshots, if  
533 applicable? [N/A]
- 534 (b) Did you describe any potential participant risks, with links to Institutional Review  
535 Board (IRB) approvals, if applicable? [N/A]
- 536 (c) Did you include the estimated hourly wage paid to participants and the total amount  
537 spent on participant compensation? [N/A]

# Appendix

538

## 539 A Code examples

### 540 A.1 Code examples for optimality conditions

541 Our library provides several reusable optimality condition mappings  $F$  or fixed points  $T$ . We  
542 nevertheless demonstrate the ease of writing some of them from scratch.

543 **Proximal gradient fixed point.** The proximal gradient fixed point (7) with step size  $\eta = 1$  is  
544  $T(x, \theta) = \text{prox}_g(x - \nabla_1 f(x, \theta_f), \theta_g)$ . It can be implemented as follows.

```
grad = jax.grad(f)

def T(x, theta):
    theta_f, theta_g = theta
    return prox(x - grad(x, theta_f), theta_g)
```

Figure 5: Proximal gradient fixed point  $T(x, \theta)$

545 We recall that when the proximity operator is a projection, we recover the projected gradient fixed  
546 point as a special case. Therefore, this fixed point can also be used for constrained optimization. We  
547 provide numerous proximal and projection operators in the library.

548 **KKT conditions.** As a more advanced example, we now describe how to implement the KKT  
549 conditions (6). The stationarity, primal feasibility and complementary slackness conditions read

$$\begin{aligned} \nabla_1 f(z, \theta_f) + [\partial_1 G(z, \theta_G)]^\top \lambda + [\partial_1 H(z, \theta_H)]^\top \nu &= 0 \\ H(z, \theta_H) &= 0 \\ \lambda \circ G(z, \theta_G) &= 0. \end{aligned}$$

550 Using `jax.vjp` to compute vector-Jacobian products, this can be implemented as

```
grad = jax.grad(f)

def F(x, theta):
    z, nu, lambd = x
    theta_f, theta_H, theta_G = theta

    _, H_vjp = jax.vjp(H, z, theta_H)
    stationarity = (grad(z, theta_f) + H_vjp(nu)[0])

    primal_feasability = H(z, theta_H)

    _, G_vjp = jax.vjp(G, z, theta_G)
    stationarity += G_vjp(lambd)[0]
    comp_slackness = G(z, theta_G) * lambd

    return stationarity, primal_feasability, comp_slackness
```

Figure 6: KKT conditions  $F(x, \theta)$

551 Similar mappings  $F$  can be written if the optimization problem contains only equality constraints or  
552 only inequality constraints.

553 **Mirror descent fixed point.** Letting  $\eta = 1$  and denoting  $\theta = (\theta_f, \theta_{\text{proj}})$ , the fixed point (11) is

$$\begin{aligned}\hat{x} &= \nabla\varphi(x) \\ y &= \hat{x} - \nabla_1 f(x, \theta_f) \\ T(x, \theta) &= \text{proj}_{\mathcal{C}}^{\varphi}(y, \theta_{\text{proj}}).\end{aligned}$$

554 We can then implement it as follows.

```
grad = jax.grad(f)

def T(x, theta):
    theta_f, theta_proj = params
    x_hat = phi_mapping(x)
    y = x_hat - grad(x, theta_f)
    return bregman_projection(y, theta_proj)
```

Figure 7: Mirror descent fixed point  $T(x, \theta)$

555 Although not considered in this example, the mapping  $\nabla\varphi$  could also depend on  $\theta$  if necessary.

## 556 A.2 Code examples for experiments

557 We now sketch how to implement our experiments using our framework. In the following, `jnp` is  
558 short for `jax.numpy`. In all experiments, we only show how to compute gradients with the outer  
559 objective. We can then use these gradients with gradient-based solvers to solve the outer objective.

### 560 Multiclass SVM experiment.

```
X_tr, Y_tr, X_val, Y_val = load_data()

def W(x, theta): # dual-primal map
    return jnp.dot(X_tr.T, Y_tr - x) / theta

def f(x, theta): # inner objective
    return 0.5 * theta * jnp.sum(W(x, theta) ** 2)

grad = jax.grad(f)
proj = jax.vmap(projection_simplex)
def T(x, theta):
    return proj(x - grad(x, theta))

@custom_fixed_point(T)
def msvm_dual_solver(theta):
    # [...]
    return x_star # solution of the dual objective

def outer_loss(lambd):
    theta = jnp.exp(lambd)
    x_star = msvm_dual_solver(theta) # inner solution
    Y_pred = jnp.dot(W(x_star, theta), X_val)
    return 0.5 * jnp.sum((Y_pred - Y_val) ** 2)

print(jax.grad(outer_loss)(lambd))
```

Figure 8: Code example for the multiclass SVM experiment.

561 **Task-driven dictionary learning experiment.**

```
X_tr, y_tr = load_data()

def f(x, theta): # dictionary loss
    residual = X_tr - jnp.dot(x, theta)
    return huber_loss(residual)

grad = jax.grad(f)
def T(x, theta): # proximal gradient fixed point
    return prox_lasso(x - grad(x, theta))

@custom_fixed_point(T)
def sparse_coding(theta): # inner objective
    # [...]
    return x_star # lasso solution

def outer_loss(theta, w): # task-driven loss
    x_star = sparse_coding(theta) # sparse codes
    y_pred = jnp.dot(x_star, w)
    return logloss(y_tr, y_pred)

print(jax.grad(outer_loss, argnums=(0,1)))
```

Figure 9: Code example for the task-driven dictionary learning experiment.

562 **Dataset distillation experiment.**

```
X_tr, y_tr = load_data()

logloss = jax.vmap(loss.multiclass_logistic_loss)

def f(x, theta, l2reg=1e-3): # inner objective
    scores = jnp.dot(theta, x)
    distilled_labels = jnp.arange(10)
    penalty = l2reg * jnp.sum(x * x)
    return jnp.mean(logloss(distilled_labels, scores)) + penalty

F = jax.grad(f)

@custom_root(F)
def logreg_solver(theta):
    # [...]
    return x_star

def outer_loss(theta):
    x_star = logreg_solver(theta) # inner solution
    scores = jnp.dot(X_tr, x_star)
    return jnp.mean(logloss(y_tr, scores))

print(jax.grad(outer_loss)(theta))
```

Figure 10: Code example for the dataset distillation experiment.

563 **Molecular dynamics experiment.**

```

energy_fn = soft_sphere_energy_fun(diameter)
init_fn, apply_fn = jax_md.minimize.fire_descent(
    energy_fun, shift_fun)

x0 = random.uniform(key, (N, 2))
R0 = L * x0 # transform to physical coordinates
R = lax.fori_loop(
    0, num_optimization_steps,
    body_fun=lambda t, state: apply_fn(state, t=t),
    init_val=init_fn(R0)).position
x = R / L

def normalized_forces(x, diameter):
    energy_fn = soft_sphere_energy_fun(diameter)
    normalized_energy_fun = lambda x: energy_fn(L * x)
    return -jax.grad(normalized_energy_fun)(x)

dx = root_jvp(normalized_forces, x, diameter, 1.0,
               solve=linear_solve.solve_bicgstab)
print(dx)

```

Figure 11: Code for the molecular dynamics experiment.

564 **B Jacobian products**

565 Our library provides numerous reusable building blocks. We describe in this section how to compute  
566 their Jacobian products. As a general guideline, whenever a projection enjoys a closed form, we leave  
567 the Jacobian product to the autodiff system.

568 **B.1 Jacobian products of projections**

569 We describe in this section how to compute the Jacobian products of the projections (in the Euclidean  
570 and KL senses) onto various convex sets. When the convex set does not depend on any variable, we  
571 simply denote it  $\mathcal{C}$  instead of  $\mathcal{C}(\theta)$ .

572 **Non-negative orthant.** When  $\mathcal{C}$  is the non-negative orthant,  $\mathcal{C} = \mathbb{R}_+^d$ , we obtain  $\text{proj}_{\mathcal{C}}(y) =$   
573  $\max(y, 0)$ , where the maximum is evaluated element-wise. This is also known as the ReLU function.  
574 The projection in the KL sense reduces to the exponential function,  $\text{proj}_{\mathcal{C}}^{\varphi}(y) = \exp(y)$ .

575 **Box constraints.** When  $\mathcal{C}(\theta)$  is the box constraints  $\mathcal{C}(\theta) = [\theta_1, \theta_2]^d$  with  $\theta \in \mathbb{R}^2$ , we obtain  

$$\text{proj}_{\mathcal{C}}(y, \theta) = \text{clip}(y, \theta_1, \theta_2) := \max(\min(y, \theta_2), \theta_1).$$

576 This is trivially extended to support different boxes for each coordinate, in which case  $\theta \in \mathbb{R}^{d \times 2}$ .

577 **Probability simplex.** When  $\mathcal{C}$  is the standard probability simplex,  $\mathcal{C} = \Delta^d$ , there is no analytical  
578 solution for  $\text{proj}_{\mathcal{C}}(y)$ . Nevertheless, the projection can be computed exactly in  $O(d)$  expected time or  
579  $O(d \log d)$  worst-case time [18, 49, 29, 22]. The Jacobian is given by  $\text{diag}(s) - ss^T / \|s\|_1$ , where  
580  $s \in \{0, 1\}^d$  is a vector indicating the support of  $\text{proj}_{\mathcal{C}}(y)$  [48]. The projection in the KL sense, on the  
581 other hand, enjoys a closed form: it reduces to the usual softmax  $\text{proj}_{\mathcal{C}}^{\varphi}(y) = \exp(y) / \sum_{j=1}^d \exp(y_j)$ .

582 **Box sections.** Consider now the Euclidean projection  $z^*(\theta) = \text{proj}_{\mathcal{C}}(y, \theta)$  onto the set  $\mathcal{C}(\theta) =$   
583  $\{z \in \mathbb{R}^d : \alpha_i \leq z_i \leq \beta_i, i \in [d]; w^T z = c\}$ , where  $\theta = (\alpha, \beta, w, c)$ . This projection is a singly-  
584 constrained bounded quadratic program. It is easy to check (see, e.g., [52]) that an optimal solution

585 satisfies for all  $i \in [d]$

$$z_i^*(\theta) = [L(x^*(\theta), \theta)]_i := \text{clip}(w_i x^*(\theta) + y_i, \alpha_i, \beta_i)$$

586 where  $L: \mathbb{R} \times \mathbb{R}^n \rightarrow \mathbb{R}^d$  is the dual-primal mapping and  $x^*(\theta) \in \mathbb{R}$  is the optimal dual variable of  
587 the linear constraint, which should be the root of

$$F(x^*(\theta), \theta) = L(x^*(\theta), \theta)^\top w - c.$$

588 The root can be found, e.g., by bisection. The gradient  $\nabla x^*(\theta)$  is given by  $\nabla x^*(\theta) = B^\top / A$  and the  
589 Jacobian  $\partial z^*(\theta)$  is obtained by application of the chain rule on  $L$ .

590 **Norm balls.** When  $\mathcal{C}(\theta) = \{x \in \mathbb{R}^d: \|x\| \leq \theta\}$ , where  $\|\cdot\|$  is a norm and  $\theta \in \mathbb{R}_+$ ,  $\text{proj}_{\mathcal{C}}(y, \theta)$   
591 becomes the projection onto a norm ball. The projection onto the  $\ell_1$ -ball reduces to a projection onto  
592 the simplex, see, e.g., [29]. The projections onto the  $\ell_2$  and  $\ell_\infty$  balls enjoy a closed-form, see, e.g.,  
593 [55, §6.5]. Since they rely on simple composition of functions, all three projections can therefore be  
594 automatically differentiated.

595 **Affine sets.** When  $\mathcal{C}(\theta) = \{x \in \mathbb{R}^d: Ax = b\}$ , where  $A \in \mathbb{R}^{p \times d}$ ,  $b \in \mathbb{R}^p$  and  $\theta = (A, b)$ , we get

$$\text{proj}_{\mathcal{C}}(y, \theta) = y - A^\dagger(Ay - b) = y - A^\top(AA^\top)^{-1}(Ay - b)$$

596 where  $A^\dagger$  is the Moore-Penrose pseudoinverse of  $A$ . The second equality holds if  $p < d$  and  $A$  is  
597 full rank. A practical implementation can pre-compute a factorization of the Gram matrix  $AA^\top$ .  
598 Alternatively, we can also use the KKT conditions.

599 **Hyperplanes and half spaces.** When  $\mathcal{C}(\theta) = \{x \in \mathbb{R}^d: a^\top x = b\}$ , where  $a \in \mathbb{R}^d$  and  $b \in \mathbb{R}$  and  
600  $\theta = (a, b)$ , we get

$$\text{proj}_{\mathcal{C}}(y, \theta) = y - \frac{a^\top y - b}{\|a\|_2^2} a.$$

601 When  $\mathcal{C}(\theta) = \{x \in \mathbb{R}^d: a^\top x \leq b\}$ , we simply replace  $a^\top y - b$  in the numerator by  $\max(a^\top y - b, 0)$ .

602 **Transportation and Birkhoff polytopes.** When  $\mathcal{C}(\theta) = \{X \in \mathbb{R}^{p \times d}: X\mathbf{1}_d = \theta_1, X^\top \mathbf{1}_p =$   
603  $\theta_2, X \geq 0\}$ , the so-called transportation polytope, where  $\theta_1 \in \Delta^p$  and  $\theta_2 \in \Delta^d$  are marginals, we  
604 can compute approximately the projections, both in the Euclidean and KL senses, by switching to the  
605 dual or semi-dual [15]. Since both are unconstrained optimization problems, we can compute their  
606 Jacobian product by implicit differentiation using the gradient descent fixed point. An advantage of  
607 the KL geometry here is that we can use Sinkhorn [24], which is a GPU-friendly algorithm. The  
608 Birkhoff polytope, the set of doubly stochastic matrices, is obtained by fixing  $\theta_1 = \theta_2 = \mathbf{1}_d/d$ .

609 **Order simplex.** When  $\mathcal{C}(\theta) = \{x \in \mathbb{R}^d: \theta_1 \geq x_1 \geq x_2 \geq \dots \geq x_d \geq \theta_2\}$ , a so-called order  
610 simplex [37, 14], the projection operations, both in the Euclidean and KL sense, reduce to isotonic  
611 optimization [45] and can be solved exactly in  $O(d \log d)$  time using the Pool Adjacent Violators  
612 algorithm [12]. The Jacobian of the projections and efficient product with it are derived in [27, 16].

613 **Polyhedra.** More generally, we can consider polyhedra, i.e., sets of the form  $\mathcal{C}(\theta) = \{x \in$   
614  $\mathbb{R}^d: Ax = b, Cx \leq d\}$ , where  $A \in \mathbb{R}^{p \times d}$ ,  $b \in \mathbb{R}^p$ ,  $C \in \mathbb{R}^{m \times d}$ , and  $d \in \mathbb{R}^m$ . There are several  
615 ways to differentiate this projection. The first is to use the KKT conditions as detailed in §2.2. A  
616 second way is consider the dual of the projection instead, which is the maximization of a quadratic  
617 function subject to **non-negative constraints** [55, §6.2]. That is, we can reduce the projection on  
618 a polyhedron to a problem of the form (8) with non-negative constraints, which we can in turn  
619 implicitly differentiate easily using the projected gradient fixed point, combined with the projection  
620 on the non-negative orthant. Finally, we apply the dual-primal mapping, which enjoys a closed form  
621 and is therefore amenable to autodiff, to obtain the primal projection.

## 622 B.2 Jacobian products of proximity operators

623 We provide several proximity operators, including for the lasso (soft thresholding), elastic net and  
624 group lasso (block soft thresholding). All satisfy closed form expressions and can be differentiated  
625 automatically via autodiff. For more advanced proximity operators, which do not enjoy a closed form,  
626 recent works have derived their Jacobians. The Jacobians of fused lasso and oscar were derived in  
627 [51]. For general total variation, the Jacobians were derived in [65, 21].

628 **C More examples of optimality criteria and fixed points**

629 To demonstrate the generality of our approach, we describe in this section more optimality mapping  
630  $F$  or fixed point iteration  $T$ .

631 **Newton fixed point.** Let  $x$  be a root of  $G(\cdot, \theta)$ , i.e.,  $G(x, \theta) = 0$ . The fixed point iteration of  
632 Newton's method for root-finding is

$$T(x, \theta) = x - \eta[\partial_1 G(x, \theta)]^{-1}G(x, \theta).$$

633 By the chain and product rules, we have

$$\partial_1 T(x, \theta) = I - \eta(\dots)G(x, \theta) - \eta[\partial_1 G(x, \theta)]^{-1}\partial_1 G(x, \theta) = (1 - \eta)I.$$

634 Using (3), we get  $A = -\partial_1 F(x, \theta) = \eta I$ . Similarly,

$$B = \partial_2 T(x, \theta) = \partial_2 F(x, \theta) = -\eta[\partial_1 G(x, \theta)]^{-1}\partial_2 G(x, \theta).$$

635 Newton's method for optimization is obtained by choosing  $G(x, \theta) = \nabla_1 f(x, \theta)$ , which gives

$$T(x, \theta) = x - \eta[\nabla_1^2 f(x, \theta)]^{-1}\nabla_1 f(x, \theta). \quad (15)$$

636 It is easy to check that we recover the same linear system as for the gradient descent fixed point above.  
637 A practical implementation can pre-compute an LU decomposition of  $\partial_1 G(x, \theta)$ , or a Cholesky  
638 decomposition if  $\partial_1 G(x, \theta)$  is positive semi-definite.

639 **Proximal block coordinate descent fixed point.** We now consider the case when  $x^*(\theta)$  is implicit-  
640 ly defined as the solution

$$x^*(\theta) := \operatorname{argmin}_{x \in \mathbb{R}^d} f(x, \theta) + \sum_{i=1}^m g_i(x_i, \theta),$$

641 where  $g_1, \dots, g_m$  are possibly non-smooth functions operating on subvectors (blocks)  $x_1, \dots, x_m$  of  
642  $x$ . In this case, we can use for  $i \in [m]$  the fixed point

$$x_i = [T(x, \theta)]_i = \operatorname{prox}_{\eta_i g_i}(x_i - \eta_i[\nabla_1 f(x, \theta)]_i, \theta), \quad (16)$$

643 where  $\eta_1, \dots, \eta_m$  are block-wise step sizes. Clearly, when the step sizes are shared, i.e.,  $\eta_1 =$   
644  $\dots = \eta_m = \eta$ , this fixed point is equivalent to the proximal gradient fixed point (7) with  $g(x, \theta) =$   
645  $\sum_{i=1}^m g_i(x_i, \theta)$ .

646 **Quadratic programming.** We now show how to use the KKT conditions discussed in §2.2 to  
647 differentiate quadratic programs, recovering Optnet [6] as a special case. To give some intuition, let  
648 us start with a simple equality-constrained quadratic program (QP)

$$\operatorname{argmin}_{z \in \mathbb{R}^p} f(z, \theta) = \frac{1}{2}z^\top Qz + c^\top z \quad \text{subject to} \quad H(z, \theta) = Ez - d = 0,$$

649 where  $Q \in \mathbb{R}^{p \times p}$ ,  $E \in \mathbb{R}^{q \times p}$ ,  $d \in \mathbb{R}^q$ . We gather the differentiable parameters as  $\theta = (Q, E, c, d)$ .  
650 The stationarity and primal feasibility conditions give

$$\begin{aligned} \nabla_1 f(z, \theta) + [\partial_1 H(z, \theta)]^\top \nu &= Qz + c + E^\top \nu = 0 \\ H(z, \theta) &= Ez - d = 0. \end{aligned}$$

651 In matrix notation, this can be rewritten as

$$\begin{bmatrix} Q & E^\top \\ E & 0 \end{bmatrix} \begin{bmatrix} z \\ \nu \end{bmatrix} = \begin{bmatrix} -c \\ d \end{bmatrix}. \quad (17)$$

652 We can write the solution of the linear system (17) as the root  $x = (z, \nu)$  of a function  $F(x, \theta)$ . More  
653 generally, the QP can also include inequality constraints

$$\operatorname{argmin}_{z \in \mathbb{R}^p} f(z, \theta) = \frac{1}{2}z^\top Qz + c^\top z \quad \text{subject to} \quad H(z, \theta) = Ez - d = 0, G(z, \theta) = Mz - h \leq 0. \quad (18)$$

654 where  $M \in \mathbb{R}^{r \times p}$  and  $h \in \mathbb{R}^r$ . We gather the differentiable parameters as  $\theta = (Q, E, M, c, d, h)$ .  
 655 The stationarity, primal feasibility and complementary slackness conditions give

$$\begin{aligned} \nabla_1 f(z, \theta) + [\partial_1 H(z, \theta)]^\top \nu + [\partial_1 G(z, \theta)]^\top \lambda &= Qz + c + E^\top \nu + M^\top \lambda = 0 \\ H(z, \theta) &= Ez - d = 0 \\ \lambda \circ G(z, \theta) &= \text{diag}(\lambda)(Mz - h) = 0 \end{aligned}$$

656 In matrix notation, this can be written as

$$\begin{bmatrix} Q & E^\top & M^\top \\ E & 0 & 0 \\ \text{diag}(\lambda)M & 0 & 0 \end{bmatrix} \begin{bmatrix} z \\ \nu \\ \lambda \end{bmatrix} = \begin{bmatrix} -c \\ d \\ \lambda \circ h \end{bmatrix}$$

657 While  $x = (z, \nu, \lambda)$  is no longer the solution of a linear system, it is the root of a function  $F(x, \theta)$   
 658 and therefore fits our framework.

659 **Conic programming.** We now show that the differentiation of conic linear programs [3, 5], at the  
 660 heart of differentiating through cvxpy layers [2], easily fits our framework. Consider the problem

$$z^*(\lambda), s^*(\lambda) = \underset{z \in \mathbb{R}^p, s \in \mathbb{R}^m}{\text{argmin}} c^\top z \quad \text{subject to} \quad Ez + s = d, s \in \mathcal{K}, \quad (19)$$

661 where  $\lambda = (c, E, d)$ ,  $E \in \mathbb{R}^{m \times p}$ ,  $d \in \mathbb{R}^m$ ,  $c \in \mathbb{R}^p$  and  $\mathcal{K} \subseteq \mathbb{R}^m$  is a cone;  $z$  and  $s$  are the primal  
 662 and slack variables, respectively. Every convex optimization problem can be reduced to the form (19).  
 663 Let us form the skew-symmetric matrix

$$\theta(\lambda) = \begin{bmatrix} 0 & E^\top & c \\ -E & 0 & d \\ -c^\top & -d^\top & 0 \end{bmatrix} \in \mathbb{R}^{N \times N},$$

664 where  $N = p + m + 1$ . Following [3, 2, 5], we can use the homogeneous self-dual embedding to  
 665 reduce the process of solving (19) to finding a root of the residual map

$$F(x, \theta) = \theta \Pi x + \Pi^* x = ((\theta - I)\Pi + I)x, \quad (20)$$

666 where  $\Pi = \text{proj}_{\mathbb{R}^p \times \mathcal{K}^* \times \mathbb{R}_+}$  and  $\mathcal{K}^* \subseteq \mathbb{R}^m$  is the dual cone. The splitting conic solver [54],  
 667 which is based on ADMM, outputs a solution  $F(x^*(\theta), \theta) = 0$  which is decomposed as  $x^*(\theta) =$   
 668  $(u^*(\theta), v^*(\theta), w^*(\theta))$ . We can then recover the optimal solution of (19) using

$$z^*(\lambda) = u^*(\theta(\lambda)) \quad \text{and} \quad s^*(\lambda) = \text{proj}_{\mathcal{K}^*}(v^*(\theta(\lambda))) - v^*(\theta(\lambda)).$$

669 The key oracle whose JVP/VJP we need is therefore  $\Pi$ , which is studied in [4]. The projection onto a  
 670 few cones is available in our library and can be used to express  $F$ .

671 **Frank-Wolfe.** We now consider

$$x^*(\theta) = \underset{x \in \mathcal{C}(\theta) \subset \mathbb{R}^d}{\text{argmin}} f(x, \theta), \quad (21)$$

672 where  $\mathcal{C}(\theta)$  is a convex polytope, i.e., it is the convex hull of vertices  $v_1(\theta), \dots, v_m(\theta)$ . The Frank-  
 673 Wolfe algorithm requires a linear minimization oracle (LMO):

$$s \mapsto \underset{x \in \mathcal{C}(\theta)}{\text{argmin}} \langle s, x \rangle$$

674 and is a popular algorithm when this LMO is easier to compute than the projection onto  $\mathcal{C}(\theta)$ .  
 675 However, since this LMO is piecewise constant, its Jacobian is null almost everywhere. Inspired by  
 676 SparseMAP [53], which corresponds to the case when  $f$  is a quadratic, we rewrite (21) as

$$p^*(\theta) = \underset{p \in \Delta^m}{\text{argmin}} g(p, \theta) := f(V(\theta)p, \theta),$$

677 where  $V(\theta)$  is a  $d \times m$  matrix gathering the vertices  $v_1(\theta), \dots, v_m(\theta)$ . We then have  $x^*(\theta) =$   
 678  $V(\theta)p^*(\theta)$ . Since we have reduced (21) to minimization over the simplex, we can use the projected  
 679 gradient fixed point to obtain

$$T(p^*(\theta), \theta) = \text{proj}_{\Delta^m}(p^*(\theta) - \nabla_1 g(p^*(\theta), \theta)).$$

680 We can therefore compute the derivatives of  $p^*(\theta)$  by implicit differentiation and the derivatives of  
 681  $x^*(\theta)$  by chain rule. Frank-Wolfe implementations typically maintain the convex weights of the  
 682 vertices, which we use to get an approximation of  $p^*(\theta)$ . Moreover, it is well-known that after  $t$   
 683 iterations, at most  $t$  vertices are visited. We can leverage this sparsity to solve a smaller linear system.  
 684 Moreover, in practice, we only need to compute VJPs of  $x^*(\theta)$ .



685 **D Proofs and technical results**

686 *Proof of Theorem 1.* To simplify notations, we note  $A_\star := A(x^\star, \theta)$  and  $\hat{A} := A(\hat{x}, \theta)$ , and similarly  
 687 for  $B$  and  $J$ . We have by definition of the Jacobian estimate function  $A_\star J_\star = B_\star$  and  $\hat{A}\hat{J} = \hat{B}$ .  
 688 Therefore we have

$$\begin{aligned} J(\hat{x}, \theta) - \partial x^\star(\theta) &= \hat{A}^{-1}\hat{B} - A_\star^{-1}B_\star \\ &= \hat{A}^{-1}\hat{B} - \hat{A}^{-1}B_\star + \hat{A}^{-1}B_\star - A_\star^{-1}B_\star \\ &= \hat{A}^{-1}(\hat{B} - B_\star) + (\hat{A}^{-1} - A_\star^{-1})B_\star. \end{aligned}$$

689 For any invertible matrices  $M_1, M_2$ , it holds that  $M_1^{-1} - M_2^{-1} = M_1^{-1}(M_2 - M_1)M_2^{-1}$ , so

$$\|M_2^{-1} - M_1^{-1}\|_{op} \leq \|M_1^{-1}\|_{op}\|M_2 - M_1\|_{op}\|M_2^{-1}\|_{op}. \quad (22)$$

690 Therefore,

$$\|\hat{A}^{-1} - A_\star^{-1}\|_{op} \leq \frac{1}{\alpha^2}\|\hat{A} - A_\star\|_{op} \leq \frac{\gamma}{\alpha^2}\|\hat{x} - x^\star(\theta)\|. \quad (23)$$

691 As a consequence, the second term in  $J(\hat{x}, \theta) - \partial x^\star(\theta)$  can be upper bounded and we obtain

$$\begin{aligned} \|J(\hat{x}, \theta) - \partial x^\star(\theta)\| &\leq \|\hat{A}^{-1}(\hat{B} - B_\star)\| + \|(\hat{A}^{-1} - A_\star^{-1})B_\star\| \\ &\leq \|\hat{A}^{-1}\|_{op}\|\hat{B} - B_\star\| + \frac{\gamma}{\alpha^2}\|\hat{x} - x^\star(\theta)\|\|B_\star\|, \end{aligned}$$

692 which yields the desired result.  $\square$

693 **Corollary 1** (Jacobian precision for gradient descent fixed point). *Let  $f$  be such that  $f(\cdot, \theta)$  is*  
 694 *twice differentiable and  $\alpha$ -strongly convex and  $\nabla_1^2 f(\cdot, \theta)$  is  $\gamma$ -Lipschitz (in the operator norm) and*  
 695  *$\partial_2 \nabla_1 f(x, \theta)$  is  $\beta$ -Lipschitz and bounded in norm by  $R$ . The estimated Jacobian evaluated at  $\hat{x}$  is*  
 696 *then given by*

$$J(\hat{x}, \theta) = -(\nabla_1^2 f(\hat{x}, \theta))^{-1} \partial_2 \nabla_1 f(\hat{x}, \theta).$$

697 For all  $\theta \in \mathbb{R}^n$ , and any  $\hat{x}$  estimating  $x^\star(\theta)$ , we have the following bound for the approximation  
 698 error of the estimated Jacobian

$$\|J(\hat{x}, \theta) - \partial x^\star(\theta)\| \leq \left( \frac{\beta}{\alpha} + \frac{\gamma R}{\alpha^2} \right) \|\hat{x} - x^\star(\theta)\|.$$

699 *Proof of Corollary 1.* This follows from Theorem 1, applied to this specific  $A(x, \theta)$  and  $B(x, \theta)$ .  $\square$

700 **Corollary 2** (Jacobian precision for proximal gradient descent fixed point). *Let  $f$  be such that*  
 701  *$f(\cdot, \theta)$  is twice differentiable and  $\alpha$ -strongly convex and  $\nabla_1^2 f(\cdot, \theta)$  is  $\gamma$ -Lipschitz (in the operator*  
 702 *norm) and  $\partial_2 \nabla_1 f(x, \theta)$  is  $\beta$ -Lipschitz and bounded in norm by  $R$ . Let  $g : \mathbb{R}^d \rightarrow \mathbb{R}$  be a twice-*  
 703 *differentiable  $\mu$ -strongly convex,  $\lambda$  smooth function (i.e. whose Hessian has a spectrum in  $[\mu, \lambda]$ ,*  
 704 *for which  $\Gamma(x, \theta) = \nabla^2 g(\text{prox}_{\eta g}(x - \eta \nabla_1 f(x, \theta)))$  is  $\kappa$ -Lipschitz in its first argument. The estimated*  
 705 *Jacobian evaluated at  $\hat{x}$  is then given by*

$$J(\hat{x}, \theta) = -(I_d + \eta \Gamma(x, \theta))(\nabla_1^2 f(\hat{x}, \theta) + \nabla_1^2 g(\hat{x}))^{-1} \partial_2 \nabla_1 f(\hat{x}, \theta)(I_d + \eta \Gamma(x, \theta))^{-1}.$$

706 For all  $\theta \in \mathbb{R}^n$ , and any  $\hat{x}$  estimating  $x^\star(\theta)$ , we have the following bound for the approximation  
 707 error of the estimated Jacobian

$$\|J(\hat{x}, \theta) - \partial x^\star(\theta)\| \leq (\tilde{\beta}_\eta / \tilde{\alpha}_\eta + \tilde{R}_\eta \tilde{\rho}_\eta) \|\hat{x} - x^\star(\theta)\|,$$

708 where

$$\tilde{\alpha}_\eta := \frac{\alpha + \mu}{1 + \eta\lambda}, \quad \tilde{R}_\eta := \frac{R}{1 + \eta\mu}, \quad \tilde{\rho}_\eta := (1 + \eta\lambda) \frac{\gamma + \kappa}{(\alpha + \mu)^2} + \frac{\eta\kappa}{\alpha + \mu}, \quad \tilde{\beta}_\eta := \frac{\beta}{1 + \eta\mu} + \frac{\eta\kappa R}{(1 + \eta\mu)^2}$$

709 *Proof of Corollary 2.* First, let us note that  $\text{prox}_{\eta g}(y, \theta)$  does not depend on  $\theta$ , since  $g$  itself does not  
 710 depend on  $\theta$ , and is therefore equal to classical proximity operator of  $\eta g$  which, with a slight overload  
 711 of notations, we denote as  $\text{prox}_{\eta g}(y)$  (with a single argument). In other words,

$$\begin{cases} \text{prox}_{\eta g}(y, \theta) &= \text{prox}_{\eta g}(y), \\ \partial_1 \text{prox}_{\eta g}(y, \theta) &= \partial \text{prox}_{\eta g}(y), \\ \partial_2 \text{prox}_{\eta g}(y, \theta) &= 0. \end{cases}$$

712 Regarding the first claim (expression of the estimated Jacobian evaluated at  $\hat{x}$ ), we first have that  
 713  $\text{prox}_{\eta g}(y)$  is the solution to  $(x' - y) + \eta \nabla g(x') = 0$  in  $x'$  - by first-order condition for a smooth  
 714 convex function. We therefore have that

$$\begin{aligned}\text{prox}_{\eta g}(y) &= (I + \eta \nabla g)^{-1}(y) \\ \partial \text{prox}_{\eta g}(y) &= (I_d + \eta \nabla^2 g(\text{prox}_{\eta g}(y)))^{-1},\end{aligned}$$

715 the first  $I$  and inverse being functional identity and inverse, and the second  $I_d$  and inverse being in  
 716 the matrix sense, by inverse rule for Jacobians  $\partial h(z) = [\partial h^{-1}(h(z))]^{-1}$  (applied to the prox).

717 As a consequence, we have, for  $\Gamma(x, \theta) = \nabla^2 g(\text{prox}_{\eta g}(x - \eta \nabla_1 f(x, \theta)))$  that

$$\begin{aligned}A(x, \theta) &= I_d - (I_d - \eta \nabla_1^2 f(x, \theta))(I_d + \eta \Gamma(x, \theta))^{-1} \\ &= [I_d + \eta \Gamma(x, \theta) - (I_d - \eta \nabla_1^2 f(x, \theta))](I_d + \eta \Gamma(x, \theta))^{-1} \\ &= \eta (\nabla_1^2 f(x, \theta) + \Gamma(x, \theta))(I_d + \eta \Gamma(x, \theta))^{-1} \\ B(x, \theta) &= \eta \partial_2 \nabla_1 f(x, \theta)(I_d + \eta \Gamma(x, \theta))^{-1}.\end{aligned}$$

718 As a consequence, for all  $x \in \mathbb{R}^d$ , we have that

$$J(x, \theta) = -(I_d + \eta \Gamma(x, \theta))(\nabla_1^2 f(x, \theta) + \Gamma(x, \theta))^{-1} \partial_2 \nabla_1 f(x, \theta)(I_d + \eta \Gamma(x, \theta))^{-1}.$$

719 In the following, we rescale both  $A$  and  $B$  by a factor  $\eta$  that is cancelled out in the computation of  $J$ .

720 Under the same notations for  $\hat{A}$ ,  $A_*$ ,  $\hat{B}$ , and  $B_*$ , we have that

$$\|\hat{A}^{-1}\|_{\text{op}} \leq \frac{1 + \eta\lambda}{\alpha + \mu} := \frac{1}{\tilde{\alpha}_\eta}, \quad \|B_*\| \leq \frac{R}{1 + \eta\mu} := \tilde{R}_\eta,$$

721 and using (22):

$$\|(I_d + \eta \Gamma_*)^{-1} - (I_d + \eta \hat{\Gamma})^{-1}\|_{\text{op}} \leq \frac{\eta \kappa \|\hat{x} - x^*(\theta)\|}{(1 + \eta\mu)^2}.$$

722 Further, using that for all matrices  $M_1, M'_1, M_2$  and  $M'_2$ , we have

$$\|M_1 M_2 - M'_1 M'_2\|_{\text{op}} \leq \|M_1\|_{\text{op}} \|M_2 - M'_2\|_{\text{op}} + \|M'_2\|_{\text{op}} \|M_1 - M'_1\|_{\text{op}},$$

723 we have

$$\begin{aligned}\|\hat{A}^{-1} - A_*^{-1}\|_{\text{op}} &\leq \left[ (1 + \eta\lambda) \frac{\gamma + \kappa}{(\alpha + \mu)^2} + \frac{\eta\kappa}{\alpha + \mu} \right] \|\hat{x} - x^*(\theta)\| := \tilde{\rho}_\eta \|\hat{x} - x^*(\theta)\| \\ \|\hat{B} - B_*\| &\leq \left[ \frac{\beta}{1 + \eta\mu} + \frac{\eta\kappa R}{(1 + \eta\mu)^2} \right] \|\hat{x} - x^*(\theta)\| := \tilde{\beta}_\eta \|\hat{x} - x^*(\theta)\|.\end{aligned}$$

724 While this does not show that  $A$  is Lipschitz, as assumed in Theorem 1, this directly proves that  $A^{-1}$   
 725 is Lipschitz, which is in fact what we need in the proof of Theorem 1, and that we deduced from  
 726 the Lipschitzness and well-conditioning of  $A$  in (23). Following the proof of Theorem 1 yields as  
 727 desired

$$\|J(\hat{x}, \theta) - \partial x^*(\theta)\| \leq (\tilde{\beta}_\eta / \tilde{\alpha}_\eta + \tilde{R}_\eta \tilde{\rho}_\eta) \|\hat{x} - x^*(\theta)\|.$$

728 □

## 729 E Experimental setup and additional results

730 Our experiments use JAX [17], which is Apache2-licensed and scikit-learn [58], which is BSD-  
 731 licensed.

### 732 E.1 Hyperparameter optimization of multiclass SVMs

733 **Experimental setup.** Synthetic datasets were generated using `scikit-learn`'s  
 734 `sklearn.datasets.make_classification` [58], following a model adapted from [38].  
 735 All datasets consist of  $m = 700$  training samples belonging to  $k = 5$  distinct  
 736 classes. To simulate problems of different sizes, the number of features is varied as  
 737  $p \in \{100, 250, 500, 750, 1000, 2000, 3000, 4000, 5000, 7500, 10000\}$ , with 10% of features

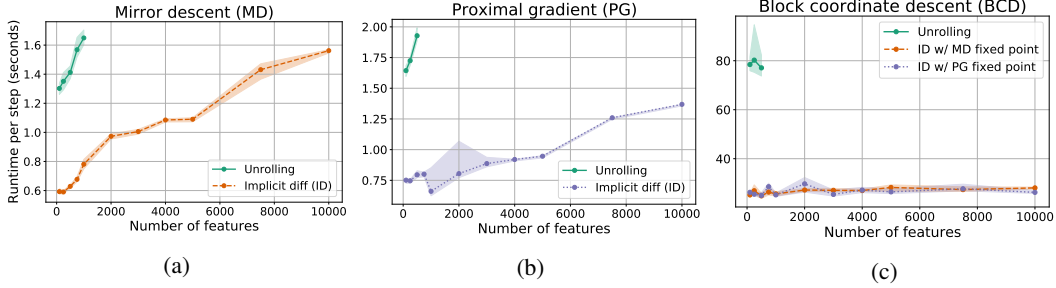

Figure 12: GPU runtime comparison of implicit differentiation and unrolling for hyperparameter optimization of multiclass SVMs for multiple problem sizes (same setting as Figure 2). Error bars represent 90% confidence intervals. Absent data points were due to out-of-memory errors (16 GB maximum).

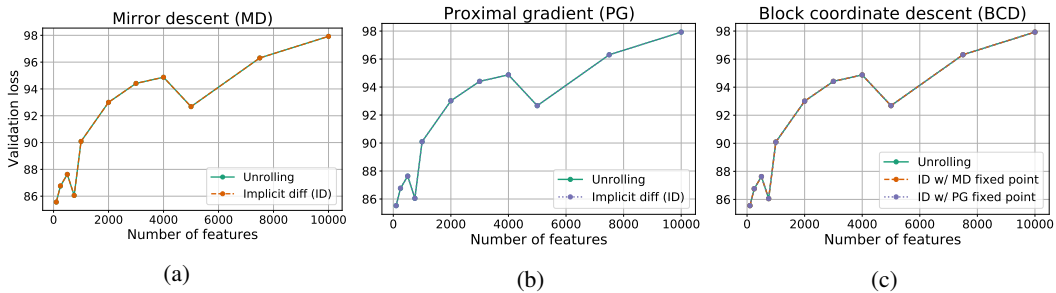

Figure 13: Value of the outer problem objective function (validation loss) for hyperparameter optimization of multiclass SVMs for multiple problem sizes (same setting as Figure 2). As can be seen, all methods performed similarly in terms of validation loss.

738 being informative and the rest random noise. In all cases, an additional  $m_{\text{val}} = 200$  validation  
 739 samples were generated from the same model to define the outer problem.

740 For the inner problem, we employed three different solvers: (i) mirror descent, (ii) (accelerated)  
 741 proximal gradient descent and (iii) block coordinate descent. Hyperparameters for all solvers were  
 742 individually tuned manually to ensure convergence across the range of problem sizes. For mirror  
 743 descent, a stepsize of 1.0 was used for the first 100 steps, following a inverse square root decay  
 744 afterwards up to a total of 2500 steps. For proximal gradient descent, a stepsize of  $5 \cdot 10^{-4}$  was used  
 745 for 2500 steps. The block coordinate descent solver was run for 500 iterations. All solvers used the  
 746 same initialization, namely,  $x_{\text{init}} = \frac{1}{k} \mathbf{1}_{m \times k}$ , which satisfies the dual constraints.

747 For the outer problem, gradient descent was used with a stepsize of  $5 \cdot 10^{-3}$  for the first 100 steps,  
 748 following a inverse square root decay afterwards up to a total of 150 steps.

749 Conjugate gradient was used to solve the linear systems in implicit differentiation for at most 2500  
 750 iterations.

751 All results reported pertaining CPU runtimes were obtained using an internal compute cluster. GPU  
 752 results were obtained using a single NVIDIA P100 GPU with 16GB of memory per dataset. For each  
 753 dataset size, we report the average runtime of an individual iteration in the outer problem, alongside a  
 754 90% confidence interval estimated from the corresponding 150 runtime values.

755 **Additional results** Figure 12 compares the runtime of implicit differentiation and unrolling on  
 756 GPU. These results highlight a fundamental limitation of the unrolling approach in memory-limited  
 757 systems such as accelerators, as the inner solver suffered from out-of-memory errors for most problem  
 758 sizes ( $p \geq 2000$  for mirror descent,  $p \geq 750$  for proximal gradient and block coordinate descent).  
 759 While it might be possible to ameliorate this limitation by reducing the maximum number of iterations  
 760 in the inner solver, doing so might lead to additional challenges [69] and require careful tuning.

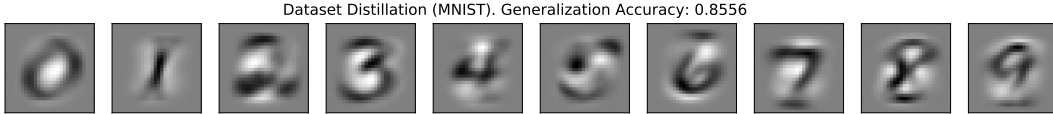

Figure 14: Distilled MNIST dataset  $\theta \in \mathbb{R}^{k \times p}$  obtained by solving (14) through unrolled differentiation. Although there is no qualitative difference, the implicit differentiation approach is 4 times faster.

761 Figure 13 depicts the validation loss (value of the outer problem objective function) at convergence. It  
 762 shows that all approaches were able to solve the outer problem, with solutions produced by different  
 763 approaches being qualitatively indistinguishable from each other across the range of problem sizes  
 764 considered.

## 765 E.2 Task-driven dictionary learning

766 We downloaded from [http://acgt.cs.tau.ac.il/multi\\_omic\\_benchmark/download.html](http://acgt.cs.tau.ac.il/multi_omic_benchmark/download.html)  
 767 a set of breast cancer gene expression data together with survival information generated by the TCGA  
 768 Research Network (<https://www.cancer.gov/tcga>) and processed as explained by [60]. The  
 769 gene expression matrix contains the expression value for  $p=20,531$  genes in  $m=1,212$  samples, from  
 770 which we keep only the primary tumors ( $m=1,093$ ). From the survival information, we select the  
 771 patients who survived at least five years after diagnosis ( $m_1 = 200$ ), and the patients who died before  
 772 five years ( $m_0 = 99$ ), resulting in a cohort of  $m = 299$  patients with gene expression and binary  
 773 label. Note that non-selected patients are those who are marked as alive but were not followed for 5  
 774 years.

775 To evaluate different binary classification methods on this cohort, we repeated 10 times a random split  
 776 of the full cohort into a training (60%), validation (20%) and test (20%) sets. For each split and each  
 777 method, 1) the method is trained with different parameters on the training set, 2) the parameter that  
 778 maximizes the classification AUC on the validation set is selected, 3) the method is then re-trained on  
 779 the union of the training and validation sets with the selected parameter, and 4) we measure the AUC  
 780 of that model on the test set. We then report, for each method, the mean test AUC over the 10 repeats,  
 781 together with a 95% confidence interval defined a mean  $\pm 1.96 \times$  standard error of the mean.

782 We used Scikit Learn’s implementation of logistic regression regularized by  $\ell_1$  (lasso) and  $\ell_2$  (ridge)  
 783 penalty from `sklearn.linear_model.LogisticRegression`, and varied the C regularization  
 784 parameter over a grid of 10 values:  $\{10^{-5}, 10^{-3}, \dots, 10^4\}$ . For the unsupervised dictionary learning  
 785 experiment method, we estimated a dictionary from the gene expression data in the training  
 786 and validation sets, using `sklearn.decomposition.DictionaryLearning(n_components=10,`  
 787 `alpha=2.0)`, which produces sparse codes in  $k = 10$  dimensions with roughly 50% nonzero coefficients  
 788 by minimizing the squared Frobenius reconstruction distance with lasso regularization on the  
 789 code. We then use `sklearn.linear_model.LogisticRegression` to train a logistic regression on  
 790 the codes, varying the ridge regularization parameter C over a grid of 10 values  $\{10^{-1}, 10^0, \dots, 10^8\}$ .

791 Finally, we implemented the task-driven dictionary learning model (13) with our toolbox, following  
 792 the pseudo-code in Figure 9. Like for the unsupervised dictionary learning experiment, we set the  
 793 dimension of the codes to  $k = 10$ , and a fixed elastic net regularization on the inner optimization  
 794 problem to ensure that the codes have roughly 50% sparsity. For the outer optimization problem, we  
 795 solve an  $\ell_2$  regularized ridge regression problem, varying again the ridge regularization parameter  
 796 C over a grid of 10 values  $\{10^{-1}, 10^0, \dots, 10^8\}$ . Because the outer problem is non-convex, we  
 797 minimize it using the Adam optimizer [43] with default parameters.

## 798 E.3 Dataset Distillation

799 **Experimental setup.** For the inner problem, we used gradient descent with backtracking line-  
 800 search, while for the outer problem we used gradient descent with momentum and a fixed step-size.  
 801 The momentum parameter was set to 0.9 while the step-size was set to 1.

802 Fig. 3 was produced after 4000 iterations of the outer loop on CPU (Intel(R) Xeon(R) Platinum  
 803 P-8136 CPU @ 2.00GHz), which took 1h55. Unrolled differentiation took instead 8h:05 (4 times

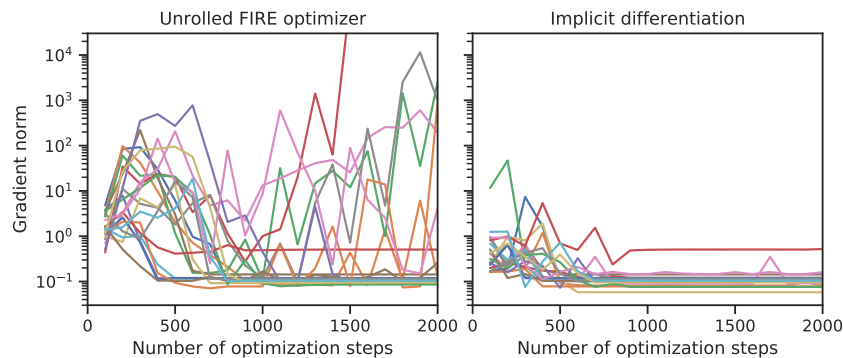

Figure 15: L1 norm of position sensitivities in the molecular dynamics simulations, for 40 different random initial conditions (different colored lines). Gradients through the unrolled FIRE optimizer [13] for many initial conditions do not converge, in contrast to implicit differentiation.

804 more) to run the same number of iterations. As can be seen in Fig. 14, the output is the same in both  
 805 approaches.

#### 806 E.4 Molecular dynamics

807 Our experimental setup is adapted from the JAX-MD example notebook available at [https://](https://github.com/google/jax-md/blob/master/notebooks/meta_optimization.ipynb)  
 808 [github.com/google/jax-md/blob/master/notebooks/meta\\_optimization.ipynb](https://github.com/google/jax-md/blob/master/notebooks/meta_optimization.ipynb).

809 We emphasize that calculating the gradient of the total energy objective,  $E(x, \theta) = \sum_{ij} U_{ij}(x_{ij}, \theta)$ ,  
 810 with respect to the diameter  $\theta$  of the smaller particles,  $\partial E / \partial \theta$ , does not require implicit differentiation  
 811 or unrolling. This is because  $\nabla_1 E(x, \theta) = 0$  at  $x = x^*(\theta)$ :

$$\nabla_{\theta} E(x^*(\theta), \theta) = \partial x^*(\theta)^{\top} \nabla_1 E(x^*(\theta), \theta) + \nabla_2 E(x^*(\theta), \theta) = \nabla_2 E(x^*(\theta), \theta).$$

812 This is known as Danskin’s theorem or envelope theorem. Thus instead, we consider sensitivities of  
 813 position  $\partial x^*(\theta)$  directly, which does require implicit differentiation or unrolling.

814 Our results comparing implicit and unrolled differentiation for calculating the sensitivity of position  
 815 are shown in Fig. 15. We use BiCGSTAB [66] to perform the tangent linear solve. Like in the original  
 816 JAX-MD experiment, we use  $k = 128$  particles in two dimensions.
